# Supplementary material for: Extraction of Mycosporine-like Amino Acids and Proteins from the Agarophyte Gelidium corneum Using Pulsed Power Techniques
Source: MDPI journal article supplement (doi:10.3390/foods12071473), 2023-03-30
Supplement: s1 [file s1]

## Supplementary Materials

**Table S1.** Increases of temperature during treatment (500 kJ/kg sol)

| State of GS   | Treatment/ Ratio | Temperature increase (°C) | Maximum temperature (°C) |
|---------------|------------------|---------------------------|--------------------------|
| <b>Fresh</b>  | HVED 1:20        | 12                        | 30                       |
|               | HVED 1:40        | 11                        | 32                       |
|               | PEF 1:20         | 34                        | 49                       |
|               | PEF 1:40         | 35                        | 54                       |
| <b>Dry</b>    | HVED 1:20        | 16                        | 34                       |
|               | HVED 1:40        | 16                        | 35                       |
|               | PEF 1:20         | 43                        | 63                       |
|               | PEF 1:40         | 41                        | 56                       |
| <b>Powder</b> | HVED 1:20        | 15                        | 33                       |
|               | HVED 1:40        | 15                        | 35                       |
|               | PEF 1:20         | 36                        | 56                       |
|               | PEF 1:40         | 36                        | 58                       |

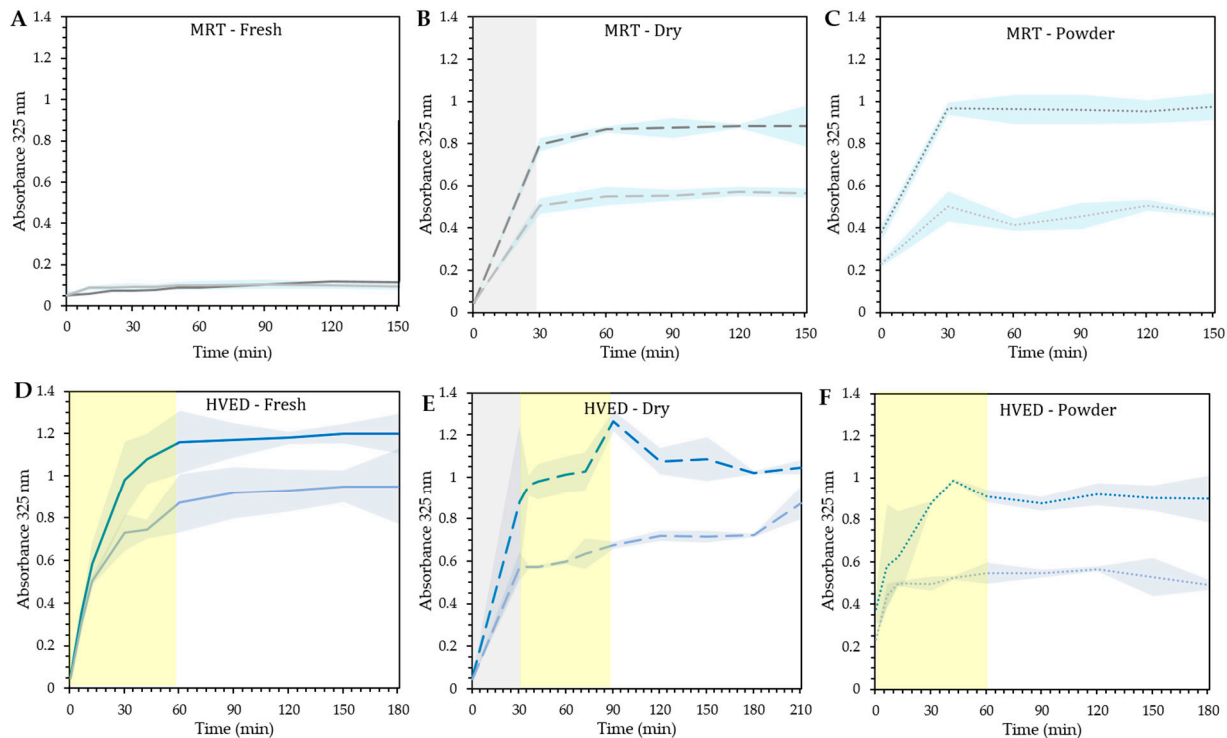

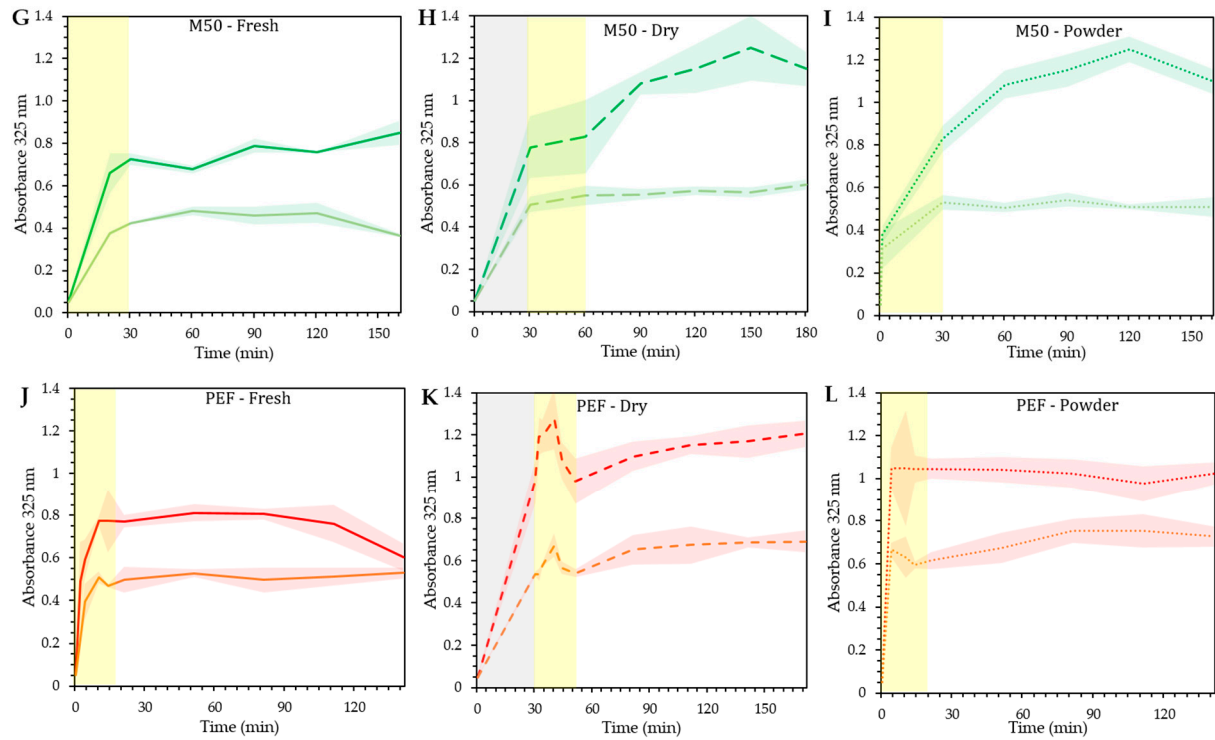

**Figure S1.** Comparison of the absorbance of UV-absorbing compounds (MAAs) at 325 nm of the two ratios: 1:20 (top curve) and 1:40 (bottom curve). (A-C). MRT; (D-F). HVED; (G-I) M50; (J-L) PEF. Yellow areas represent the treatment period. Grey areas represent initial rehydration step. Shaded areas represent the standard deviation of subsamples (n=2).

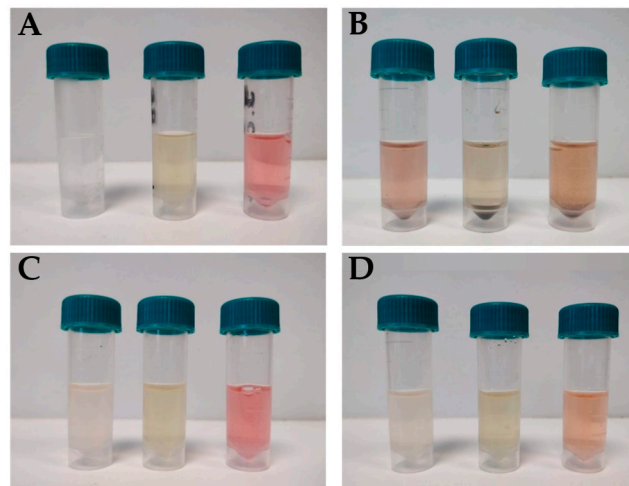

**Figure S2.** Aspect of extracts fresh, dry, powdered algal extracts (from left to right) using: (A) MRT (B) HVED; (C) M50; (D) PEF.

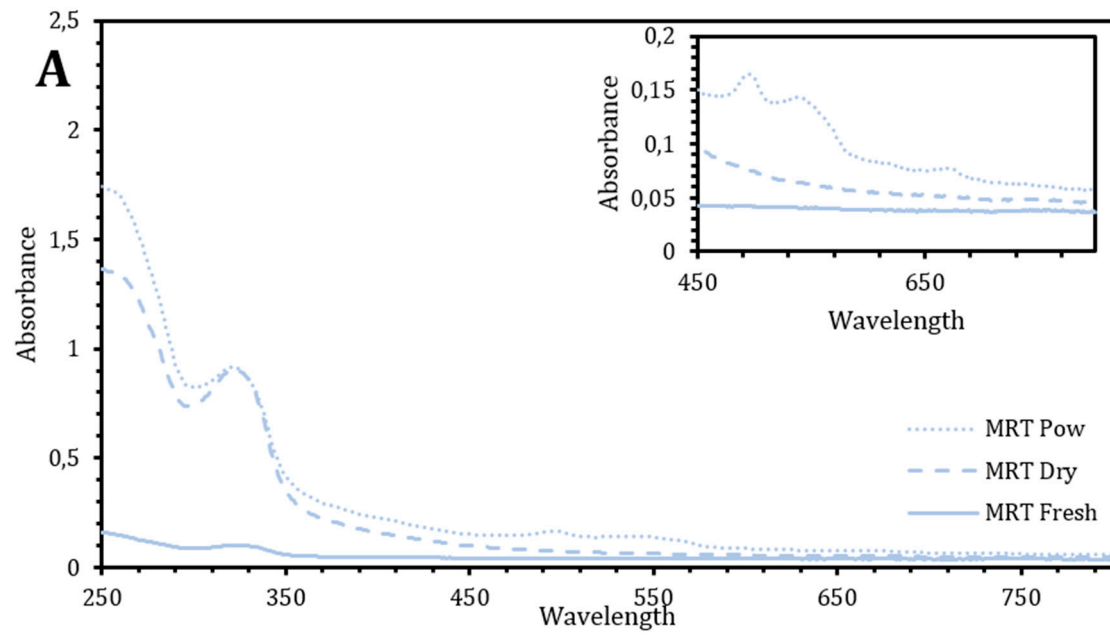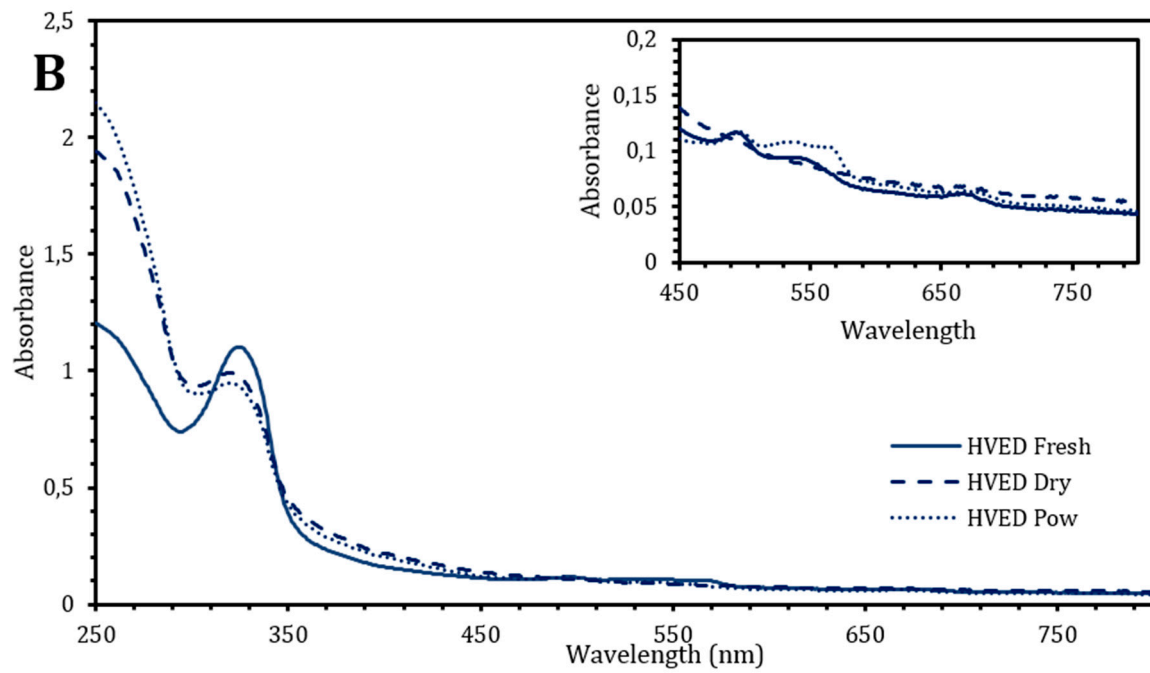

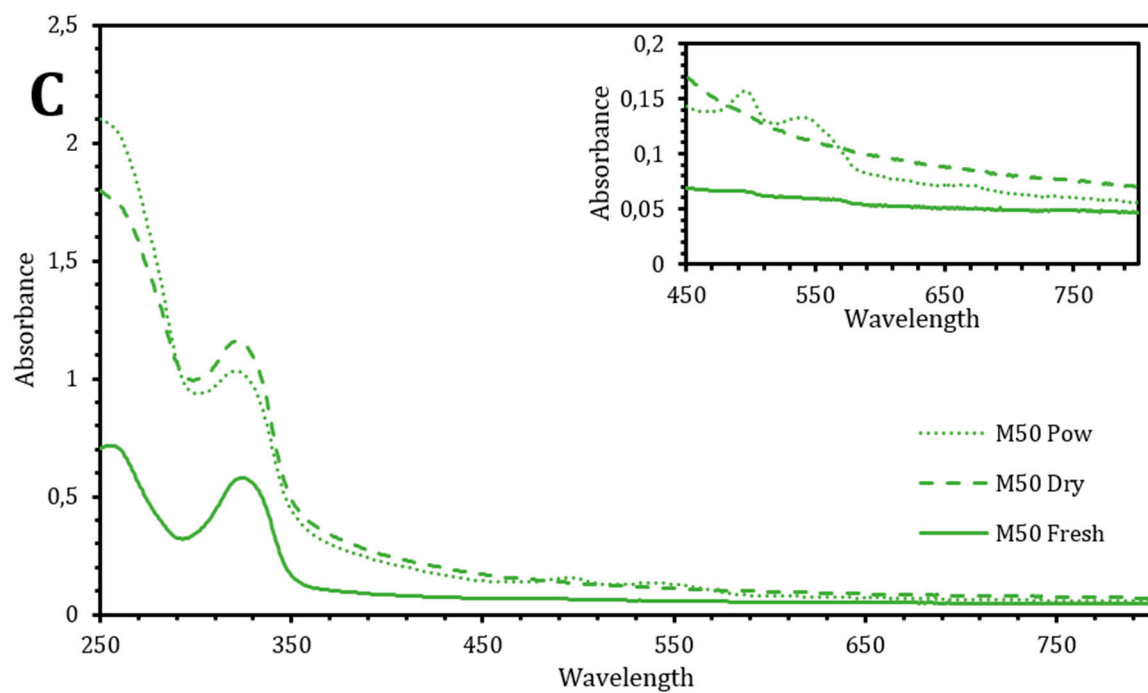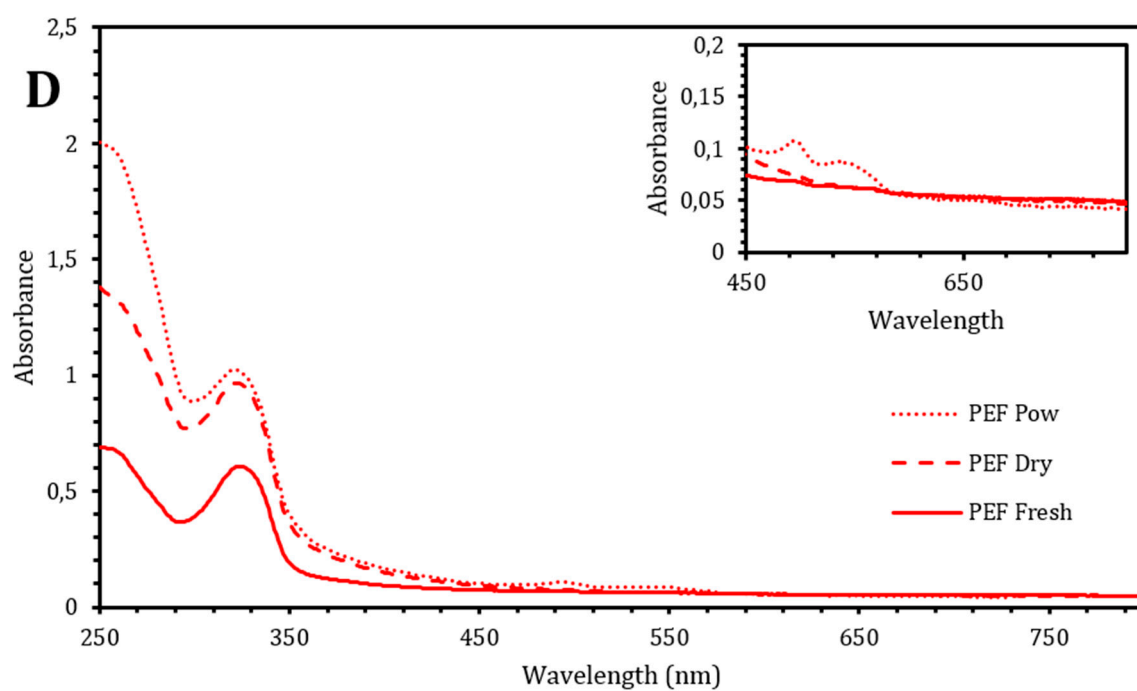

Figure S3. UV-Vis Spectra of extracts post-maceration. Insets display zoomed area between 450 and 800 nm. A/ MRT extracts B/ HVED C/ M50 D/PEF

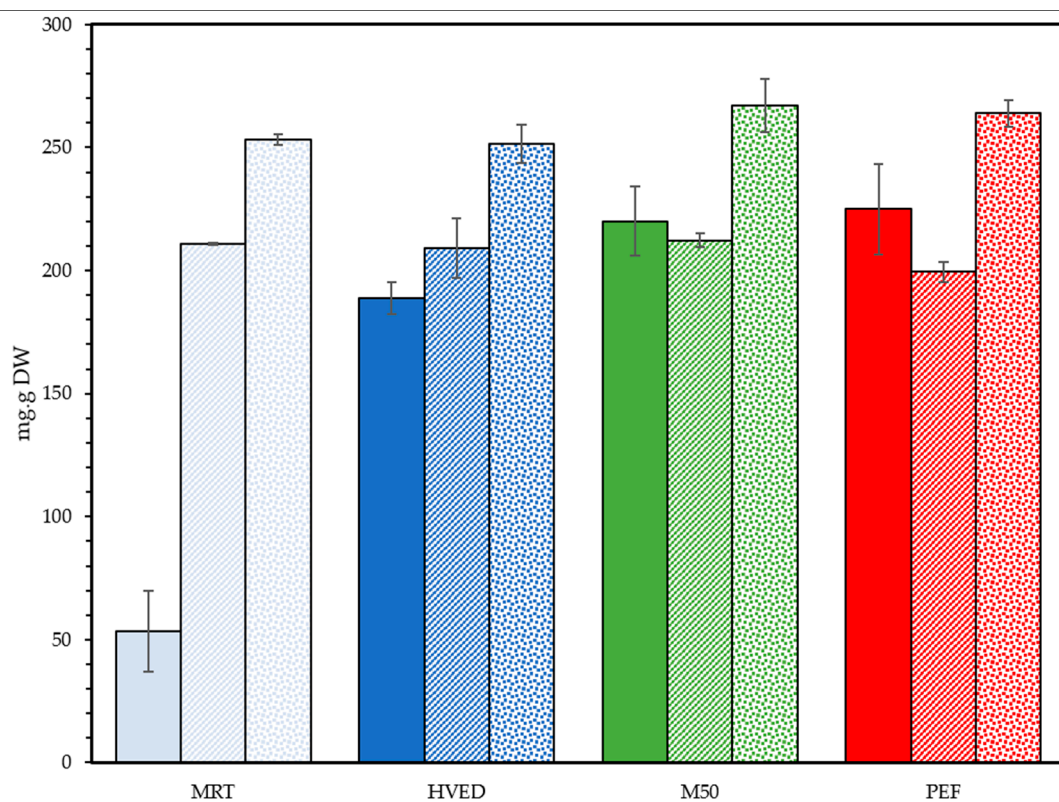

**Figure S4.** Dry weight of soluble compounds extracted from GS at 1:40 ratio. Data are shown as mean  $\pm$  SD (n=3). Upper case letters signify differences between treatments (values averaged across State, n=12). Lower case letters denote significant differences between States by Treatment n=3). Type III ANOVA with Turkey Post-Hoc test.

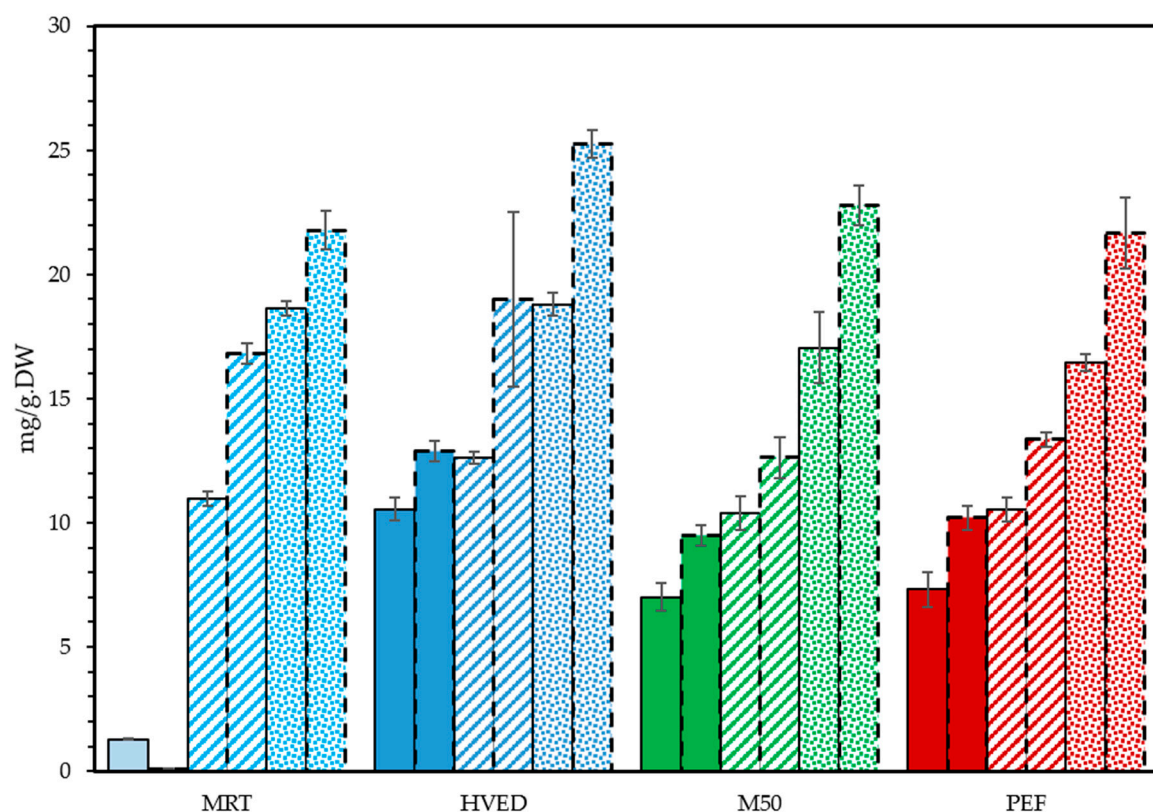

**Figure S5.** Total protein yields in different treatments. Solid fill: fresh GS. Dashed fill: dry GS. Dotted fill: powdered GS. Data are shown as mean  $\pm$  SD (n=4)

Table S2. Protein content of dry extracts for both 1:20 and 1:40 ratios.

| Protein Content of Dry Extracts |      |                  |                  |                 |                 |                 |
|---------------------------------|------|------------------|------------------|-----------------|-----------------|-----------------|
|                                 |      | MRT              | HVED             | M50             | PEF             | Average         |
| Fresh                           | 1:20 | 13.3 $\pm$ 0.2 % | 8.8 $\pm$ 0.3 %  | 3.5 $\pm$ 0.3 % | 3.9 $\pm$ 0.4 % | 6.2 $\pm$ 3.4 % |
|                                 | 1:40 | 4.8 $\pm$ 1.3 %  | 6.8 $\pm$ 0.2 %  | 4.3 $\pm$ 0.2 % | 4.2 $\pm$ 0.2 % |                 |
| Dry                             | 1:20 | 6.0 $\pm$ 0.3 %  | 6.5 $\pm$ 0.3 %  | 5.4 $\pm$ 0.2 % | 5.2 $\pm$ 0.2 % | 7.0 $\pm$ 1.0 % |
|                                 | 1:40 | 8.0 $\pm$ 0.2 %  | 9.1 $\pm$ 1.7 %  | 8.8 $\pm$ 0.4 % | 8.2 $\pm$ 0.1 % |                 |
| Powder                          | 1:20 | 6.8 $\pm$ 0.1 %  | 7.4 $\pm$ 0.2 %  | 6.8 $\pm$ 0.6 % | 6.2 $\pm$ 0.1 % | 7.7 $\pm$ 1.3 % |
|                                 | 1:40 | 8.6 $\pm$ 0.3 %  | 10.0 $\pm$ 0.2 % | 8.5 $\pm$ 0.3 % | 7.0 $\pm$ 0.5 % |                 |
| Average                         |      | 8.0 $\pm$ 0.4 %  | 8.1 $\pm$ 0.5 %  | 6.0 $\pm$ 0.3   | 5.7 $\pm$ 0.3   |                 |
